# Supplementary material for: Understanding Marine Biodegradation of Bio-Based Oligoesters and Plasticizers
Source: MDPI journal article supplement (doi:10.3390/polym15061536), 2023-03-20
Supplement: s1 [file s1]

# Understanding marine biodegradation of biobased oligoesters and plasticizers

Federico Zappaterra <sup>1</sup>, Monia Renzi<sup>2</sup>, Manuela Piccardo<sup>2</sup>, Mariachiara Spennato<sup>1</sup>, Fioretta Asaro<sup>1</sup>, Martino Di Serio<sup>3</sup>, Rosa Turco<sup>3,4</sup>, Anamaria Todea<sup>1\*</sup>, Lucia Gardossi<sup>1</sup>

\*Correspondence: atodea@units.it

## Supplementary material

|                                                                                                                                                                                    |    |
|------------------------------------------------------------------------------------------------------------------------------------------------------------------------------------|----|
| <b>Figure S1a.</b> Schematic representation of synthesis of the products obtainable from the ring opening of epoxidized triolein with 1,4-butandiol .....                          | 3  |
| <b>Figure S1b.</b> Schematic representation of synthesis of the products obtainable from the ring opening of epoxidized triolein with sorbitol .....                               | 4  |
| <b>Figure S2.</b> ESI-MS spectrum of the oligoesters synthesized starting from 1,4-BDO and AA at 70°C, in solvent-less system, using covalently immobilized CalB. ....             | 5  |
| <b>Figure S3.</b> Enlarged <sup>1</sup> H-NMR spectrum of poly(1,4-butylene adipate) in DMSO- <i>d</i> <sub>6</sub> .....                                                          | 5  |
| <b>Figure S4.</b> FT-IR spectra of the epoxidized oil, 1,4-butandiol, product ECO-SRB, Product ECO-BDO.....                                                                        | 6  |
| <b>Figure S5.</b> <sup>1</sup> H NMR spectrum of the product of the epoxidation reaction of oleic acid catalysed by Novozyme 435 in 2h .....                                       | 7  |
| <b>Figure S6.</b> Enlarged <sup>1</sup> H NMR spectrum of the product obtained after 2 h of epoxidation of linoleic acid catalysed by 450 U/g <sub>substrate</sub> of lipase ..... | 7  |
| <b>Figure S7.</b> Enlarged <sup>1</sup> H NMR spectrum of the product obtained after 3 h of epoxidation of linolenic acid catalysed by 450 U/g substrate of lipase .....           | 8  |
| <b>Figure S8.</b> GC-MS chromatograms of a) oleic acid b) reaction mixture after 2 h in which is evident the complete conversion into epoxy product (9,10-epoxistearic acid). .... | 8  |
| <b>Figure S9.</b> GC-MS chromatogram of a) linoleic acid, b) reaction mixture after 3 h. ....                                                                                      | 9  |
| <b>Figure S10.</b> GC-MS chromatogram of a) linolenic acid, b) reaction mixture. ....                                                                                              | 9  |
| <b>Figure S11.</b> The thermogram of co-oligoester containing AA-BDO units .....                                                                                                   | 10 |
| <b>Figure S12.</b> The thermogram of sample ECOSORB.....                                                                                                                           | 10 |
| <b>Figure S13.</b> The thermogram of sample ESOBDO .....                                                                                                                           | 10 |
| <b>Figure S14.</b> Differential scanning calorimetry characterization (DSC) curves of the (BDO-AA) <sub>n</sub> sample, cooling (red), 2 <sup>nd</sup> heating cycle (blue) .....  | 11 |
| <b>Figure S15.</b> Differential scanning calorimetry characterization (DSC) curves of the (Gly-AZA) <sub>n</sub> sample, cooling (red), 2 <sup>nd</sup> heating cycle (blue) ..... | 11 |
| <b>Figure S16.</b> Differential scanning calorimetry characterization (DSC) curves of the Esobdo sample, cooling (red), 2 <sup>nd</sup> heating cycle (blue) .....                 | 12 |

**Figure S17.** Differential scanning calorimetry characterization (DSC) curves of the Ecosorb sample, cooling (red), 2<sup>nd</sup> heating cycle (blue)..... 12

**Figure S18.** Differential scanning calorimetry characterization (DSC) curves of the EPX\_OIL\_C sample, cooling (red), 2<sup>nd</sup> heating cycle (blue)..... 13

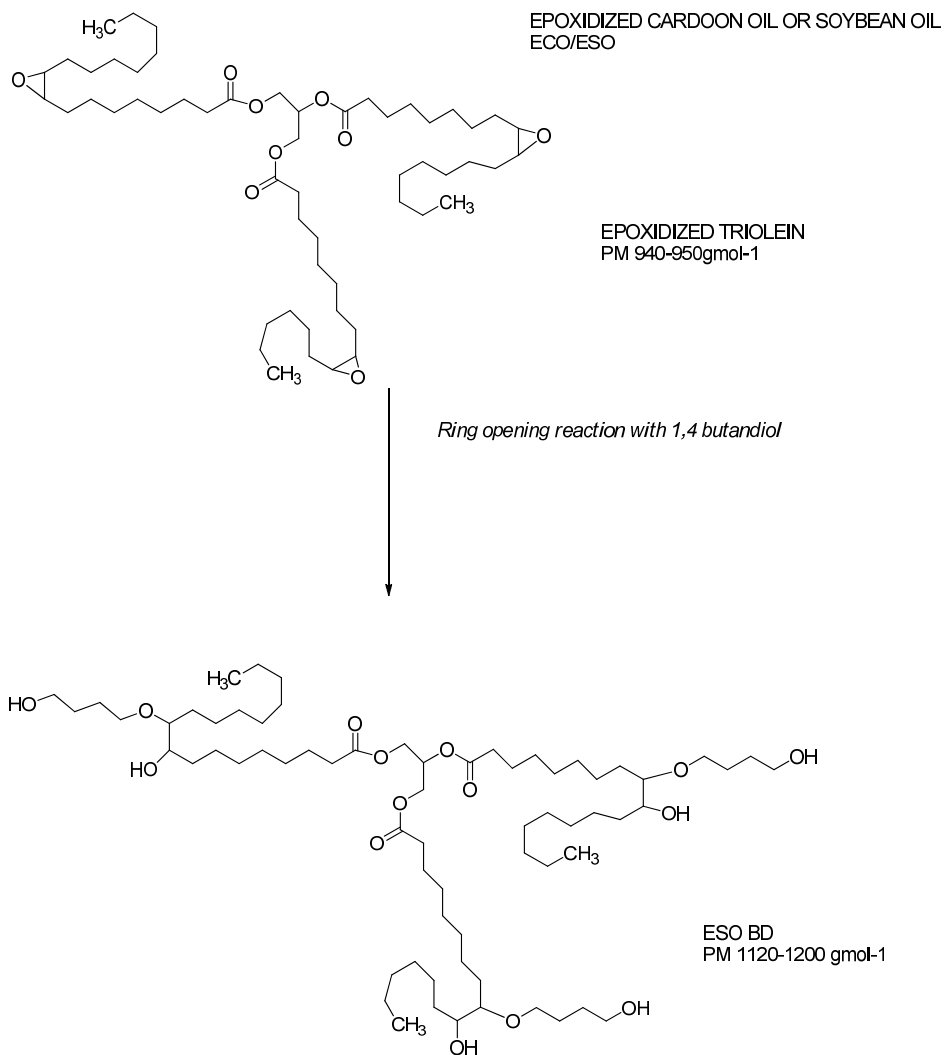

**Figure S1a.** Schematic representation of synthesis of the products obtainable from the ring opening of epoxidized triolein with 1,4-butandiol

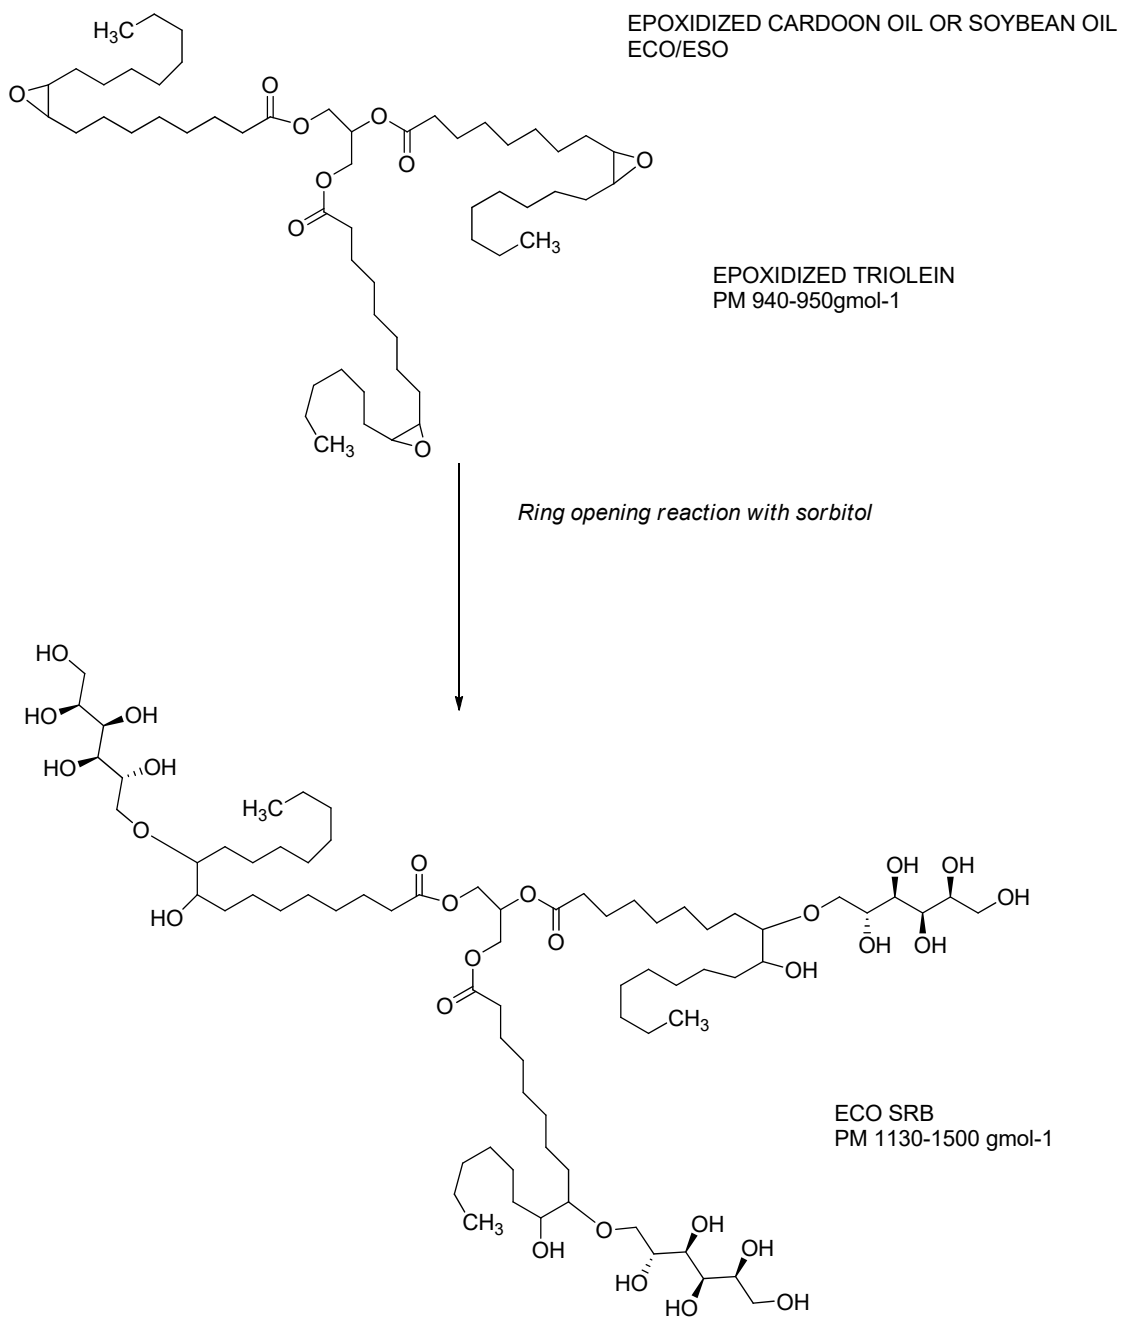

**Figure S1b.** Schematic representation of synthesis of the products obtainable from the ring opening of epoxidized triolein with sorbitol

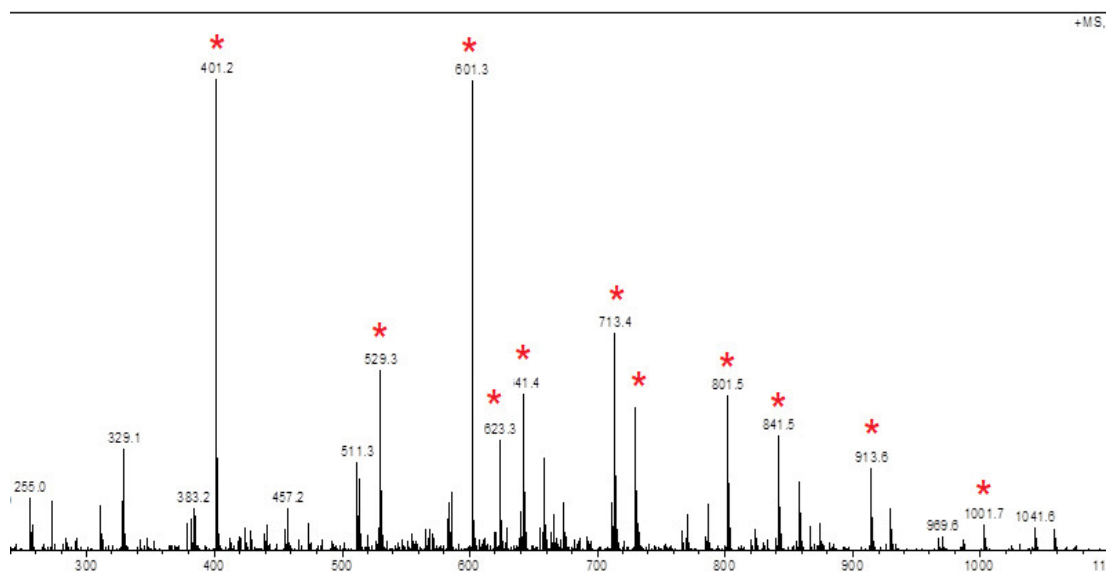

**Figure S2.** ESI-MS spectrum of the oligoesters synthesized starting from 1,4-BDO and AA at 70°C, in solvent-less system, using covalently immobilized CalB.

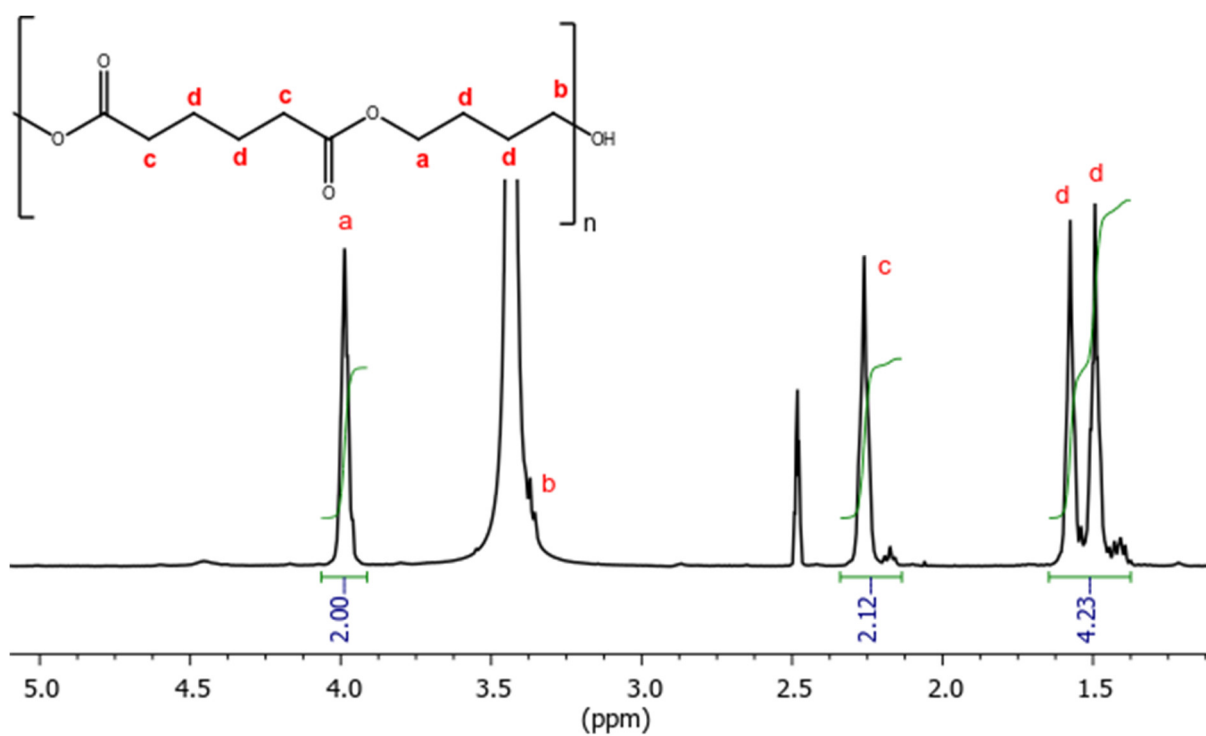

**Figure S3.** Enlarged  $^1\text{H-NMR}$  spectrum of poly(1,4-butylene adipate) in  $\text{DMSO-}d_6$ , with assignment of the signals according to [1].

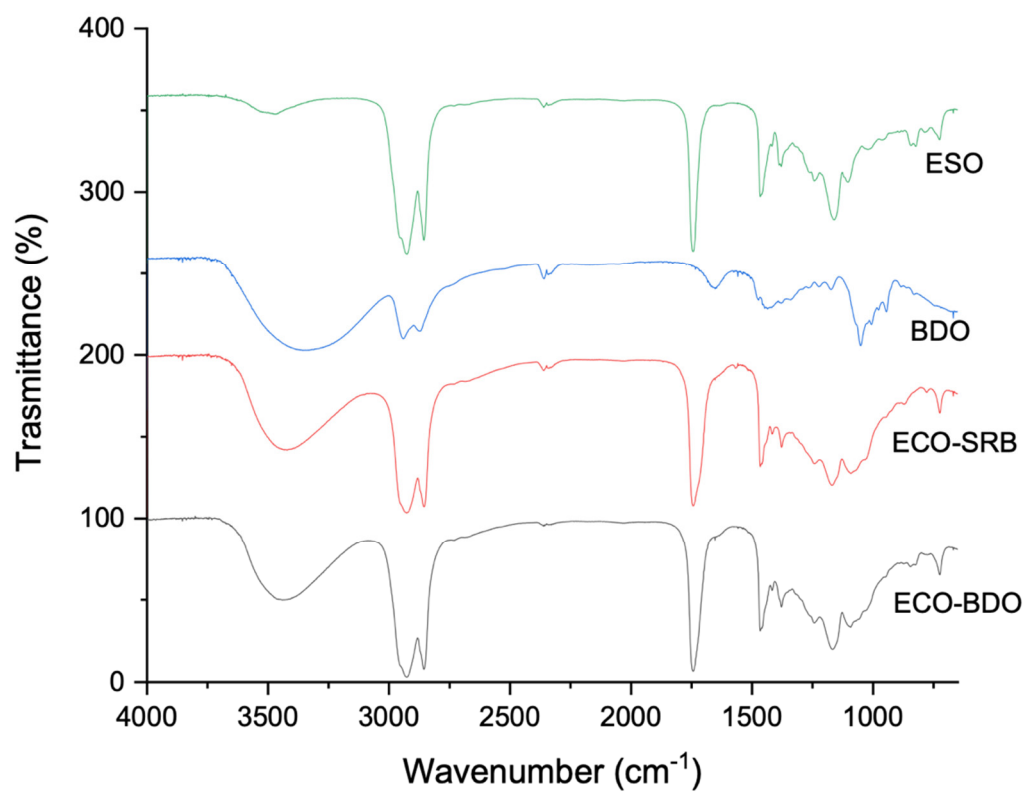

**Figure S4.** FT-IR spectra of the epoxidized oil (green), 1,4-butandiol (blue), product ECO-SRB (red), Product ECO-BDO (black).

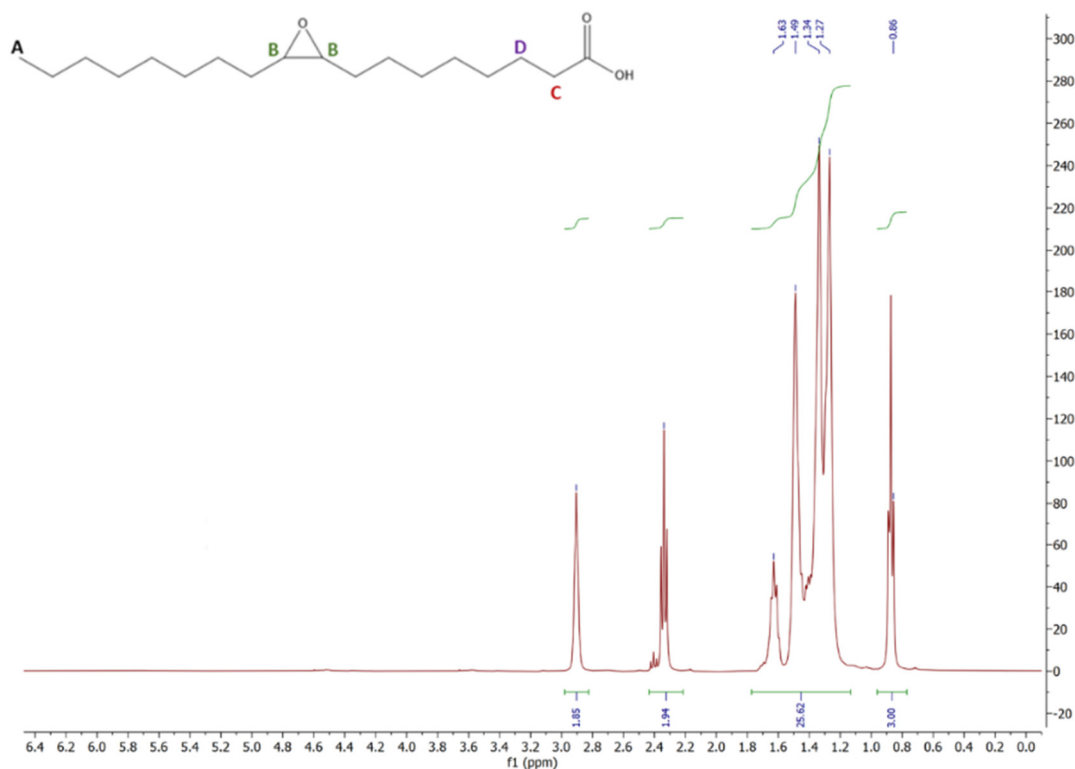

**Figure S5.**  $^1\text{H}$  NMR spectrum of the product of the epoxidation reaction of oleic acid catalysed by Novozyme 435 in 2h.  $\delta=0.89$  ppm,  $-\text{CH}_3$  (A);  $\delta=1.36$  ppm  $-\text{CH}_2-$  of chain,  $\delta=1.63$  ppm  $-\text{CH}_2-$  (D);  $\delta=2.64$  ppm  $-\text{CH}_2-$  (C);  $\delta=2.90$  ppm  $-\text{CH}-$  (B). Assignment of the signals according to [2].

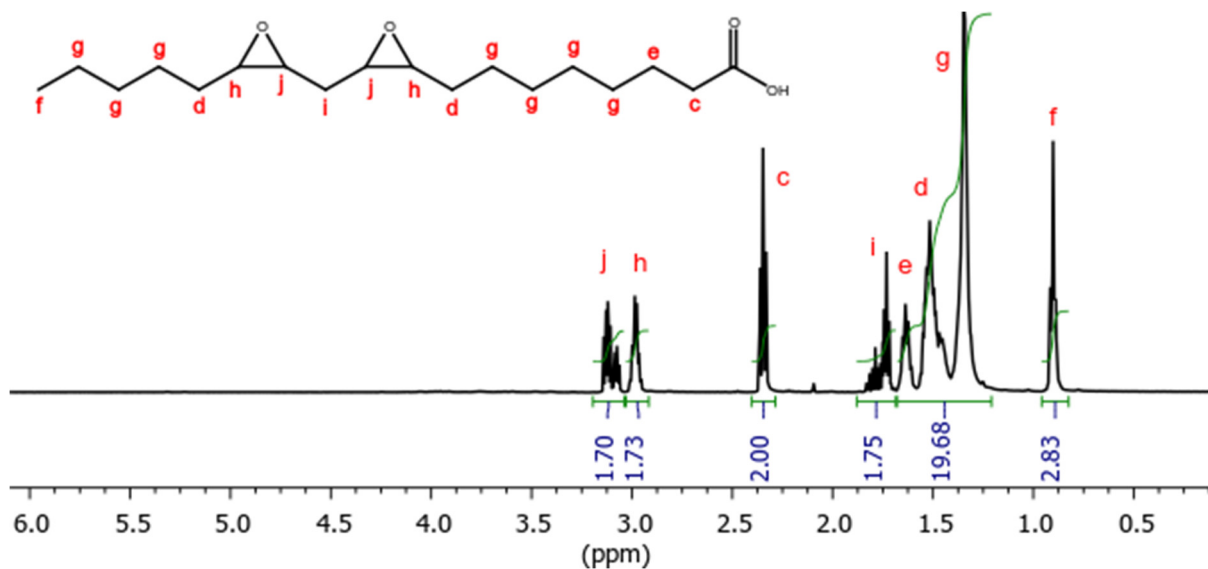

**Figure S6.** Enlarged  $^1\text{H}$  NMR spectrum of the product obtained after 2 h of epoxidation of linoleic acid catalysed by 450 U/g<sub>substrate</sub> of lipase, with assignment of the signals according to [3].-

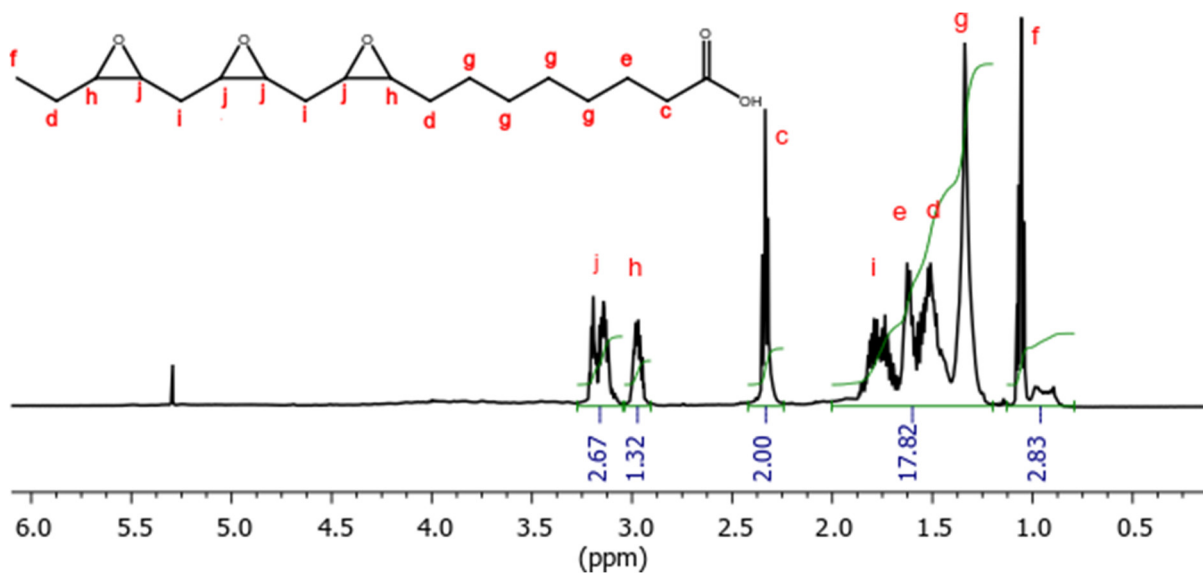

**Figure S7.** Enlarged  $^1\text{H}$  NMR spectrum of the product obtained after 3 h of epoxidation of linolenic acid catalysed by 450 U/g substrate of lipase, with assignment of the signals according to [3].

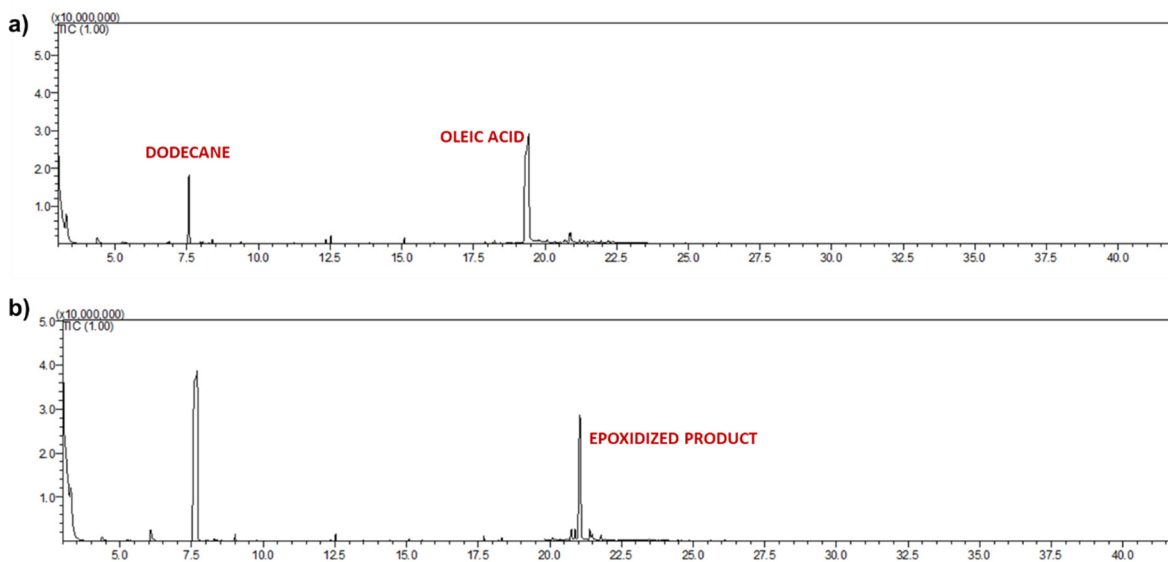

**Figure S8.** GC-MS chromatograms of a) oleic acid b) reaction mixture after 2 h in which is evident the complete conversion into epoxy product (9,10-epoxystearic acid).



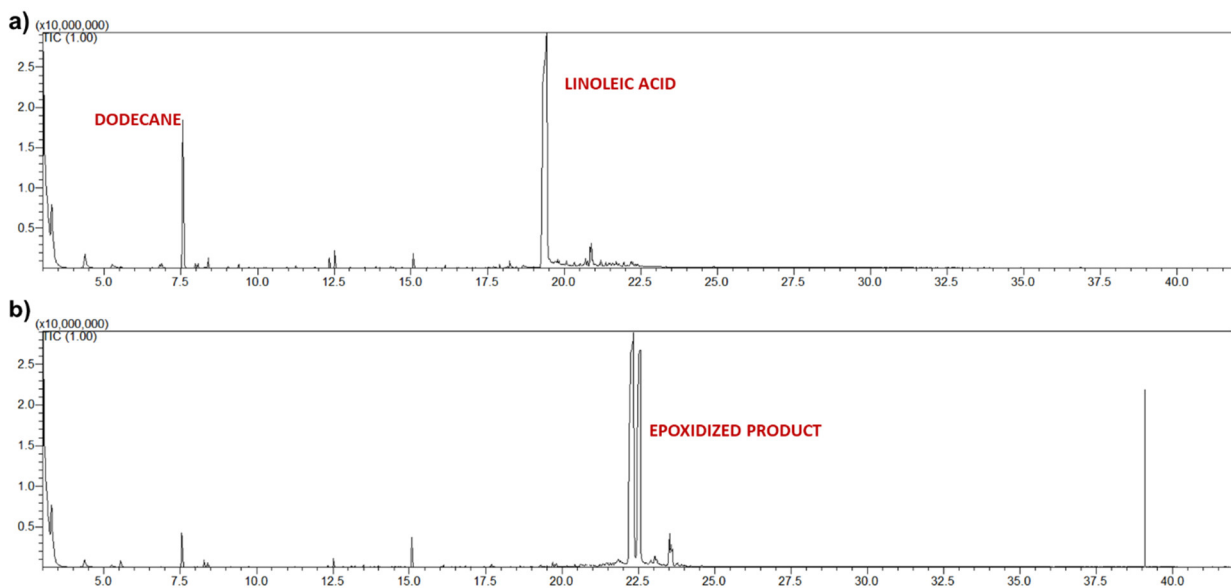

Figure S9. GC-MS chromatogram of a) linoleic acid, b) reaction mixture after 3 h.

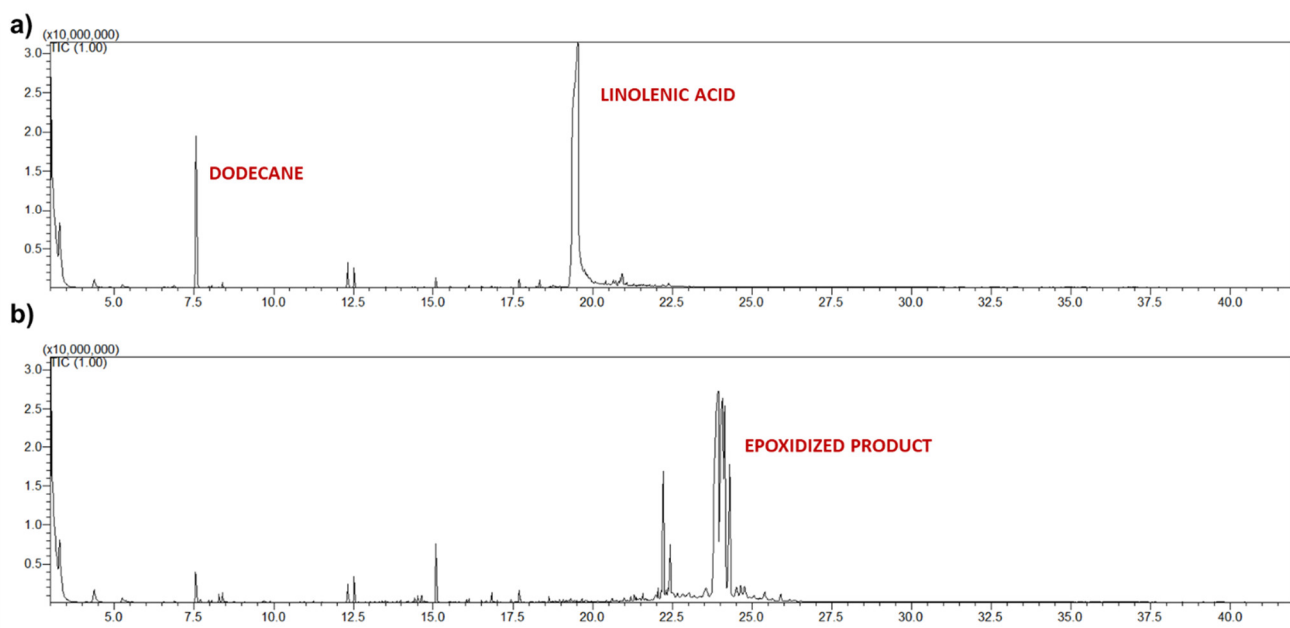

Figure S10. GC-MS chromatogram of a) linolenic acid, b) reaction mixture.

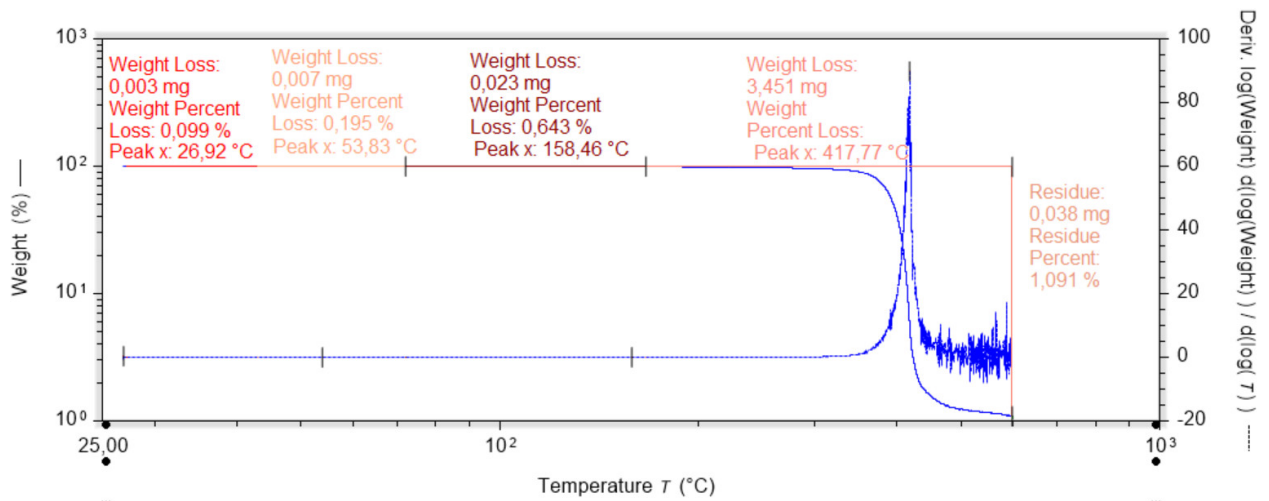

Figure S11. The thermogram of co-oligoester containing AA-BDO units

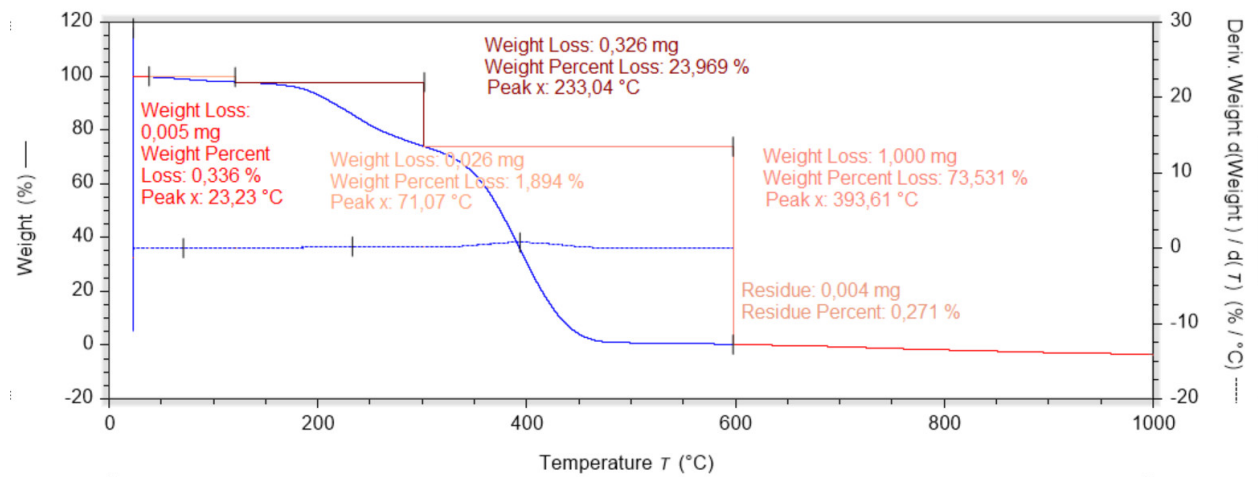

Figure S12. The thermogram of sample ECOSORB

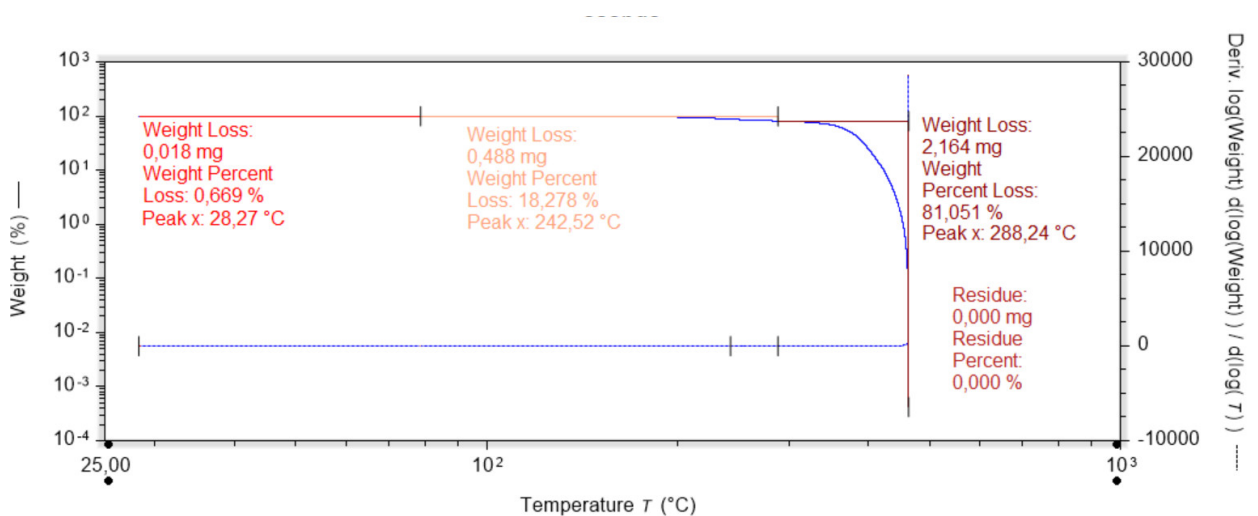

Figure S13. The thermogram of sample ESOBDO

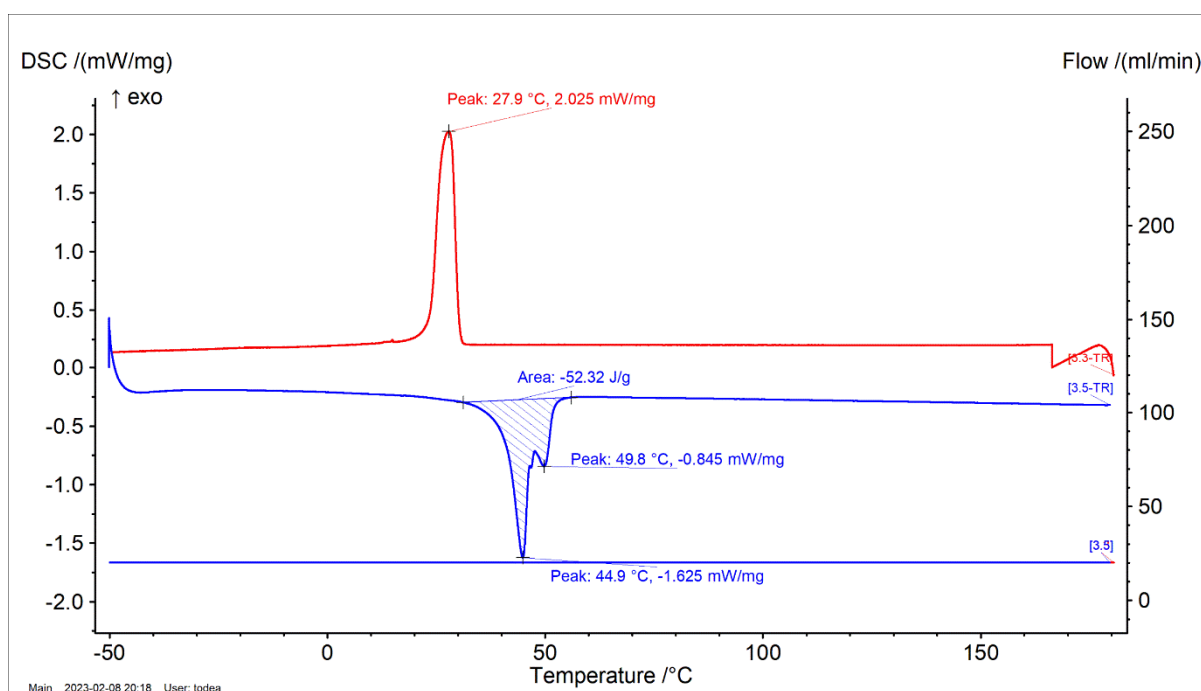

**Figure S14.** Differential scanning calorimetry characterization (DSC) curves of the (BDO-AA)<sub>n</sub> sample, cooling (red), 2<sup>nd</sup> heating cycle (blue)

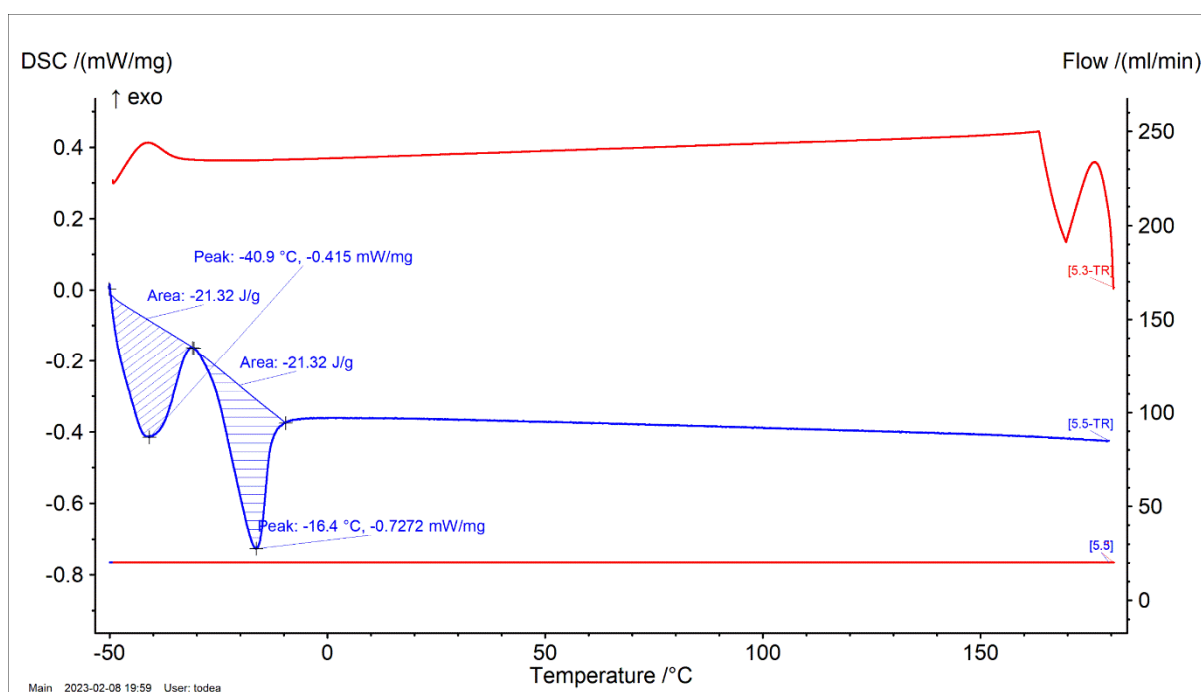

**Figure S15.** Differential scanning calorimetry characterization (DSC) curves of the (Gly-AZA)<sub>n</sub> sample, cooling (red), 2<sup>nd</sup> heating cycle (blue)

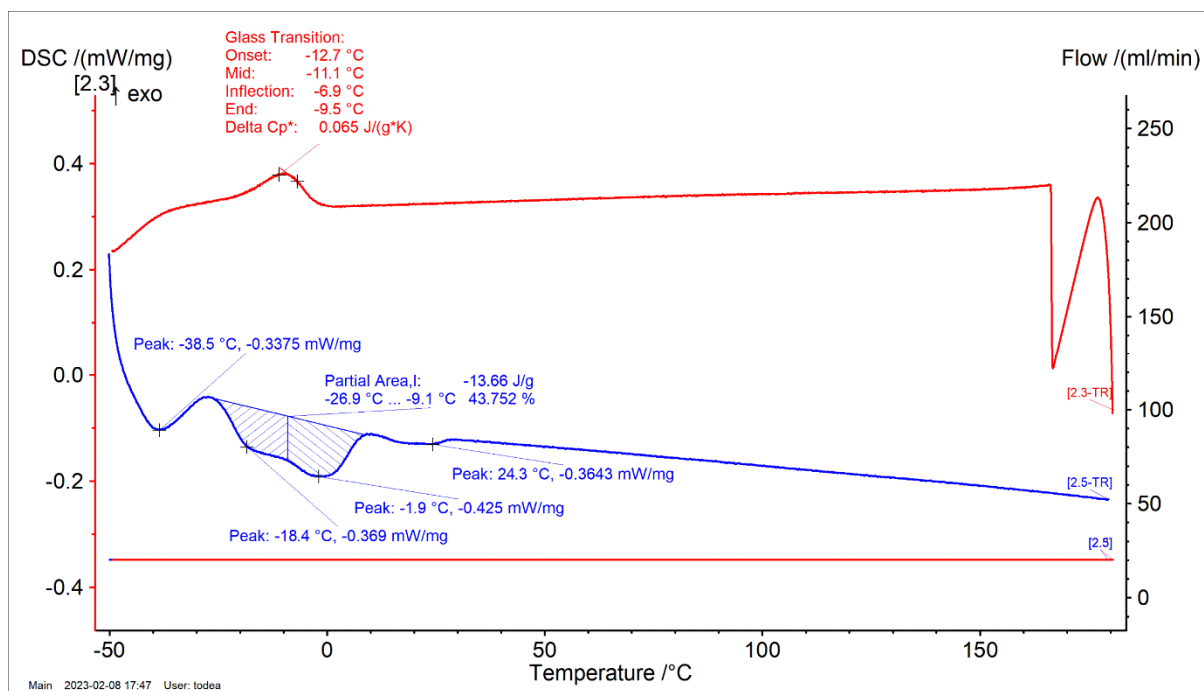

**Figure S16.** Differential scanning calorimetry characterization (DSC) curves of the Esobdo sample, cooling (red), 2<sup>nd</sup> heating cycle (blue)

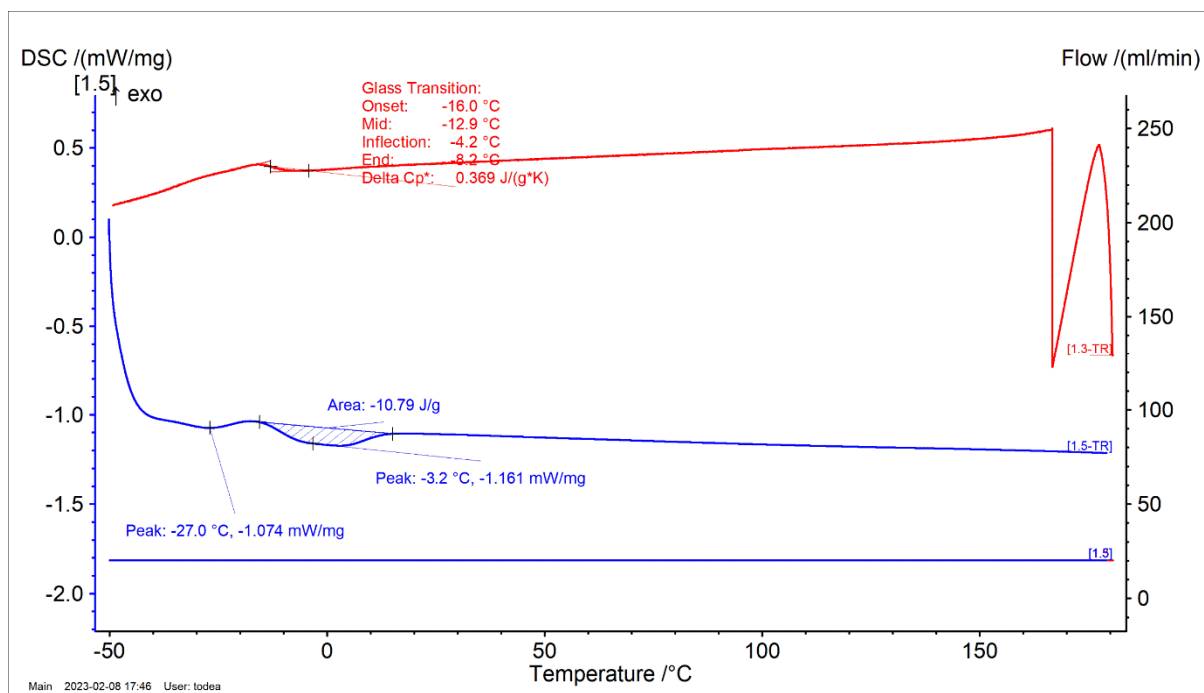

**Figure S17.** Differential scanning calorimetry characterization (DSC) curves of the Ecosorb sample, cooling (red), 2<sup>nd</sup> heating cycle (blue)

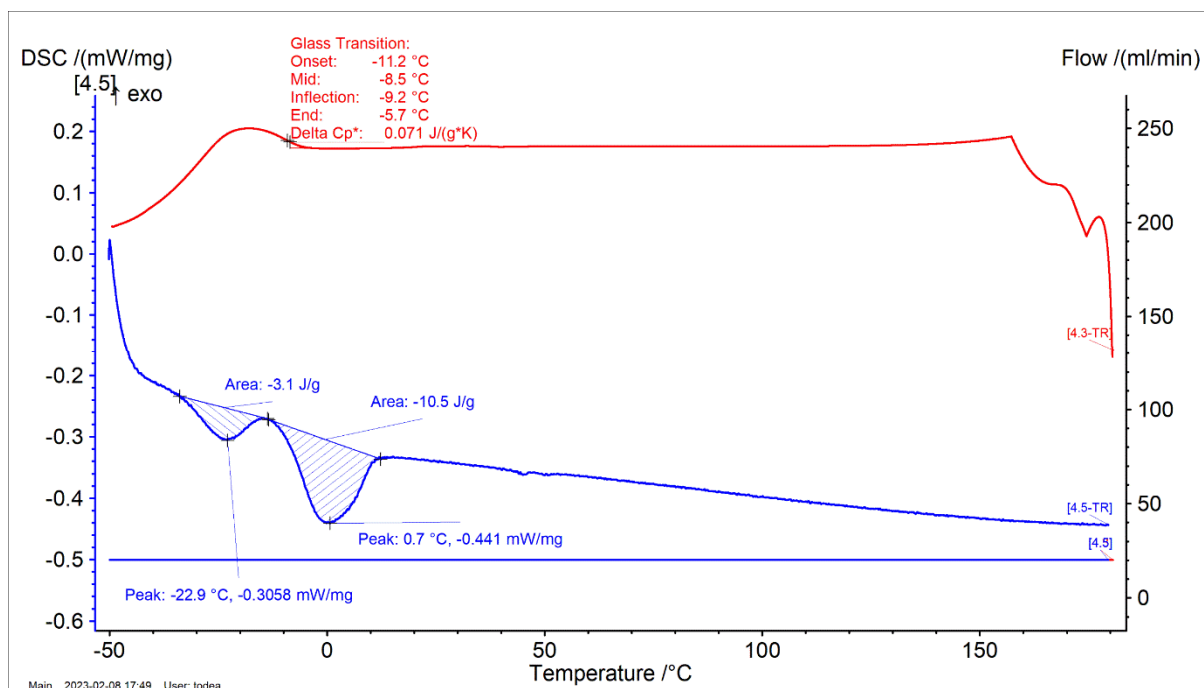

**Figure S18.** Differential scanning calorimetry characterization (DSC) curves of the EPX\_OIL\_C sample, cooling (red), 2nd heating cycle (blue)

#### SI references

- Weinberger, S.; Pellis, A.; Comerford, J. W.; Farmer, T. J.; Guebitz, G. M. Efficient Physisorption of *Candida Antarctica* Lipase B on Polypropylene Beads and Application for Polyester Synthesis. *Catalysts* **2018**, *8* (9). <https://doi.org/10.3390/catal8090369>.
- Kaur, A.; Bhardwaj, N.; Kaur, A.; Abida, K.; Nagaraja, T. P.; Ali, A.; Prakash, R. Proton Nuclear Magnetic Resonance-Based Method for the Quantification of Epoxidized Methyl Oleate. *JAACS, J. Am. Oil Chem. Soc.* **2021**, *98* (2), 139–147. <https://doi.org/10.1002/aocs.12439>.
- Xia, W.; Budge, S. M.; Lumsden, M. D. <sup>1</sup>H-NMR Characterization of Epoxides Derived from Polyunsaturated Fatty Acids. *JAACS, J. Am. Oil Chem. Soc.* **2016**, *93* (4), 467–478. <https://doi.org/10.1007/s11746-016-2800-2>.
